# Supplementary material for: SRAdb: query and use public next-generation sequencing data from within R
Source: PubMed Central journal article supplement (PMC3560148; doi:10.1186/1471-2105-14-19), 2013-01-17
Supplement: 1471-2105-14-19-S1.pdf [file 1471-2105-14-19-S1.pdf]

| Database Table | Column               | Description                                                                                                                                                                                                                                                      |
|----------------|----------------------|------------------------------------------------------------------------------------------------------------------------------------------------------------------------------------------------------------------------------------------------------------------|
| submission     | ID                   |                                                                                                                                                                                                                                                                  |
| submission     | accession            | The document's accession as assigned by the Home Archive.                                                                                                                                                                                                        |
| submission     | alias                | Submitter supplied name or id for the submission. This value can be used by the submitter to track a submission without waiting for the Archive to assign an accession.                                                                                          |
| submission     | submission_comment   | Submitter assigned comment.                                                                                                                                                                                                                                      |
| submission     | files                | Files included in the submission.                                                                                                                                                                                                                                |
| submission     | center_name          | Center name of submitter.                                                                                                                                                                                                                                        |
| submission     | broker_name          | Broker authority of this document. If not provided, then the broker is considered "direct".                                                                                                                                                                      |
| submission     | sra_link             |                                                                                                                                                                                                                                                                  |
| submission     | xref_link            |                                                                                                                                                                                                                                                                  |
| submission     | entrez_link          |                                                                                                                                                                                                                                                                  |
| submission     | ddbj_link            |                                                                                                                                                                                                                                                                  |
| submission     | ena_link             |                                                                                                                                                                                                                                                                  |
| submission     | lab_name             | Laboratory name within submitting institution.                                                                                                                                                                                                                   |
| submission     | submission_date      | Submitter assigned preparation date of this submission object.                                                                                                                                                                                                   |
| submission     | date_updated         | Datetime the record synchronized with SRA, ERA and DRA                                                                                                                                                                                                           |
| study          | ID                   |                                                                                                                                                                                                                                                                  |
| study          | alias                | Submitter designated name of the SRA document of this type. At minimum alias should be unique throughout the submission of this document type. If center_name is specified, the name should be unique in all submissions from that center of this document type. |
| study          | accession            | The document's accession as assigned by the Home Archive.                                                                                                                                                                                                        |
| study          | study_title          | Title of the study as would be used in a publication.                                                                                                                                                                                                            |
| study          | study_type           | The STUDY_TYPE presents a controlled vocabulary for expressing the overall purpose of the study.                                                                                                                                                                 |
| study          | study_abstract       | Briefly describes the goals, purpose, and scope of the Study. This need not be listed if it can be inherited from a referenced publication.                                                                                                                      |
| study          | center_project_name  | Submitter defined project name. This field is intended for backward tracking of the study record to the submitter's LIMS.                                                                                                                                        |
| study          | study_description    | More extensive free-form description of the study.                                                                                                                                                                                                               |
| study          | related_studies      | Related study or project record from a list of supported databases. The study's information is derived from this project record rather than stored as first class information.                                                                                   |
| study          | primary_study        | Whether this study object is designated as the primary source of the study or project information.                                                                                                                                                               |
| study          | broker_name          | Broker authority of this document. If not provided, then the broker is considered "direct".                                                                                                                                                                      |
| study          | sra_link             |                                                                                                                                                                                                                                                                  |
| study          | xref_link            |                                                                                                                                                                                                                                                                  |
| study          | entrez_link          |                                                                                                                                                                                                                                                                  |
| study          | ddbj_link            |                                                                                                                                                                                                                                                                  |
| study          | ena_link             |                                                                                                                                                                                                                                                                  |
| study          | url_link             | Text label to display for the link.                                                                                                                                                                                                                              |
| study          | entrez_link          | NCBI controlled vocabulary of permitted cross references. Please see <a href="http://www.ncbi.nlm.nih.gov/entrez/eutils/einfo.fcgi?">http://www.ncbi.nlm.nih.gov/entrez/eutils/einfo.fcgi?</a> .                                                                 |
| study          | study_attribute      | Properties and attributes of the study. These can be entered as free-form tag-value pairs. For certain studies, submitters may be asked to follow a community established ontology when describing the work.                                                     |
| study          | submission_accession | Submission accession                                                                                                                                                                                                                                             |
| study          | date_updated         | Datetime the record synchronized with SRA, ERA and DRA                                                                                                                                                                                                           |
| sample         | ID                   |                                                                                                                                                                                                                                                                  |
| sample         | alias                | Submitter designated name of the SRA document of this type. At minimum alias should be unique throughout the submission of this document type. If center_name is specified, the name should be unique in all submissions from that center of this document type. |
| sample         | accession            | The document's accession as assigned by the Home Archive.                                                                                                                                                                                                        |

|            |                      |                                                                                                                                                                                                                                                                  |
|------------|----------------------|------------------------------------------------------------------------------------------------------------------------------------------------------------------------------------------------------------------------------------------------------------------|
| sample     | taxon_id             | NCBI Taxonomy Identifier. This is appropriate for individual organisms and some environmental samples.                                                                                                                                                           |
| sample     | common_name          | GenBank common name of the organism. Examples: human, mouse.                                                                                                                                                                                                     |
| sample     | anonymized_name      | Anonymous public name of the sample. For example, HapMap human isolate NA12878.                                                                                                                                                                                  |
| sample     | scientific_name      | Scientific name of sample that distinguishes its taxonomy. Please use a name or synonym that is tracked in the INSDC Taxonomy database. Also, this field can be used to confirm the TAXON_ID setting.                                                            |
| sample     | individual_name      | Individual name of the sample. This field can be used to identify the individual identity of a sample where appropriate (this is usually NOT appropriate for human subjects). Example: "Glen-<br>nie" the platypus.                                              |
| sample     | description          | Free-form text describing the sample, its origin, and its method of isolation.                                                                                                                                                                                   |
| sample     | url_link             | Text label to display for the link.                                                                                                                                                                                                                              |
| sample     | entrez_link          | NCBI controlled vocabulary of permitted cross references. Please see <a href="http://www.ncbi.nlm.nih.gov/entrez/eutils/einfo.fcgi?">http://www.ncbi.nlm.nih.gov/entrez/eutils/einfo.fcgi?</a> .                                                                 |
| sample     | sample_attribute     | Properties and attributes of a sample. These can be entered as free-form tag-value pairs. For certain studies, submitters may be asked to follow a community established ontology when describing the work.                                                      |
| sample     | submission_accession | Submission accession                                                                                                                                                                                                                                             |
| sample     | broker_name          | Broker authority of this document. If not provided, then the broker is considered "direct".                                                                                                                                                                      |
| sample     | sra_link             |                                                                                                                                                                                                                                                                  |
| sample     | xref_link            |                                                                                                                                                                                                                                                                  |
| sample     | entrez_link          |                                                                                                                                                                                                                                                                  |
| sample     | ddbj_link            |                                                                                                                                                                                                                                                                  |
| sample     | ena_link             |                                                                                                                                                                                                                                                                  |
| sample     | date_updated         | Datetime the record synchronized with SRA, ERA and DRA                                                                                                                                                                                                           |
| experiment | ID                   |                                                                                                                                                                                                                                                                  |
| experiment | bamFile              | Available converted bam file name                                                                                                                                                                                                                                |
| experiment | fastqFTP             | ftp to fastq file                                                                                                                                                                                                                                                |
| experiment | alias                | Submitter designated name of the SRA document of this type. At minimum alias should be unique throughout the submission of this document type. If center_name is specified, the name should be unique in all submissions from that center of this document type. |
| experiment | accession            | The document's accession as assigned by the Home Archive.                                                                                                                                                                                                        |
| experiment | center_name          | Owner authority of this document and namespace for submitter's name of this document. If not provided, then the submitter is regarded as 'Individual' and document resolution can only happen within the submission.                                             |
| experiment | title                | Short text that can be used to call out experiment records in searches or in displays. This element is technically optional but should be used for all new records.                                                                                              |
| experiment | study_name           | Study name.                                                                                                                                                                                                                                                      |
| experiment | study_accession      | Study accession.                                                                                                                                                                                                                                                 |
| experiment | design_description   | More details about the setup and goals of the experiment as supplied by the Investigator.                                                                                                                                                                        |
| experiment | sample_name          | Sample name.                                                                                                                                                                                                                                                     |
| experiment | sample_accession     | Sample accession.                                                                                                                                                                                                                                                |
| experiment | sample_member        |                                                                                                                                                                                                                                                                  |
| experiment | library_name         | The submitter's name for this library.                                                                                                                                                                                                                           |
| experiment | library_strategy     | Sequencing technique intended for this library.                                                                                                                                                                                                                  |
| experiment | library_source       | The LIBRARY_SOURCE specifies the type of source material that is being sequenced.                                                                                                                                                                                |
| experiment | library_selection    | Whether any method was used to select and/or enrich the material being sequenced.                                                                                                                                                                                |
| experiment | library_layout       | LIBRARY_LAYOUT specifies whether to expect single, paired, or other configuration of reads. In the case of paired reads, information about the relative distance and orientation is specified.                                                                   |

|            |                               |                                                                                                                                                                                                                                                                  |
|------------|-------------------------------|------------------------------------------------------------------------------------------------------------------------------------------------------------------------------------------------------------------------------------------------------------------|
| experiment | targeted_loci                 |                                                                                                                                                                                                                                                                  |
| experiment | library_construction_protocol | Free form text describing the protocol by which the sequencing library was constructed.                                                                                                                                                                          |
| experiment | spot_length                   |                                                                                                                                                                                                                                                                  |
| experiment | adapter_spec                  | Some technologies will require knowledge of the sequencing adapter or the last base of the adapter in order to decode the spot.                                                                                                                                  |
| experiment | read_spec                     | Contains READ_INDEX, READ_LABEL, READ_CLASS, READ_TYPE, BASE_COORD, RELATIVE_ORDER, CYCLE_COORD, EXPECTED_BASECALL, EXPECTED_BASECALL_TABLE, BASECALL                                                                                                            |
| experiment | platform                      | The PLATFORM record selects which sequencing platform and platform-specific runtime parameters. This will be determined by the Center.                                                                                                                           |
| experiment | instrument_model              | Instrument model for a platform.                                                                                                                                                                                                                                 |
| experiment | platform_parameters           |                                                                                                                                                                                                                                                                  |
| experiment | sequence_space                | Base Space or Color Space                                                                                                                                                                                                                                        |
| experiment | base_caller                   | Name and version of the base or color calling software.                                                                                                                                                                                                          |
| experiment | quality_scorer                | Name and version of the quality scoring software.                                                                                                                                                                                                                |
| experiment | number_of_levels              | DEPRECATED. Number of distinct values possible with this scoring system.                                                                                                                                                                                         |
| experiment | multiplier                    | DEPRECATED.                                                                                                                                                                                                                                                      |
| experiment | qtype                         | phred or other                                                                                                                                                                                                                                                   |
| experiment | url_link                      | The internet service link (file:, http:, ftp:, etc).                                                                                                                                                                                                             |
| experiment | entrez_link                   | NCBI controlled vocabulary of permitted cross references. Please see <a href="http://www.ncbi.nlm.nih.gov/entrez/eutils/einfo.fcgi?">http://www.ncbi.nlm.nih.gov/entrez/eutils/einfo.fcgi?</a> .                                                                 |
| experiment | experiment_attribute          | Properties and attributes of the experiment. These can be entered as free-form tag-value pairs.                                                                                                                                                                  |
| experiment | submission_accession          | Submission accession                                                                                                                                                                                                                                             |
| experiment | broker_name                   | Broker authority of this document. If not provided, then the broker is considered "direct".                                                                                                                                                                      |
| experiment | sra_link                      |                                                                                                                                                                                                                                                                  |
| experiment | xref_link                     |                                                                                                                                                                                                                                                                  |
| experiment | entrez_link                   |                                                                                                                                                                                                                                                                  |
| experiment | ddbj_link                     |                                                                                                                                                                                                                                                                  |
| experiment | ena_link                      |                                                                                                                                                                                                                                                                  |
| experiment | date_updated                  | Datetime the record synchronized with SRA, ERA and DRA                                                                                                                                                                                                           |
| run        | ID                            |                                                                                                                                                                                                                                                                  |
| run        | bamFile                       | Available converted bam file name                                                                                                                                                                                                                                |
| run        | fastqFTP                      | ftp to fastq file                                                                                                                                                                                                                                                |
| run        | alias                         | Submitter designated name of the SRA document of this type. At minimum alias should be unique throughout the submission of this document type. If center_name is specified, the name should be unique in all submissions from that center of this document type. |
| run        | accession                     | The document's accession as assigned by the Home Archive.                                                                                                                                                                                                        |
| run        | instrument_name               | Center-assigned name or id of the instrument used in the run.                                                                                                                                                                                                    |
| run        | run_date                      | ISO date when the run took place.                                                                                                                                                                                                                                |
| run        | run_file                      | DEPRECATED. Name of the submission file containing the run. This file may have included multiple runs.                                                                                                                                                           |
| run        | run_center                    | If applicable, the name of the contract sequencing center that executed the run. Example: 454MSC.                                                                                                                                                                |
| run        | total_data_blocks             | DEPRECATED. The number of data blocks to expect in this run.                                                                                                                                                                                                     |
| run        | experiment_accession          | Experiment accession                                                                                                                                                                                                                                             |
| run        | experiment_name               | Experiment name                                                                                                                                                                                                                                                  |
| run        | url_link                      | The internet service link (file:, http:, ftp:, etc).                                                                                                                                                                                                             |
| run        | entrez_link                   | NCBI controlled vocabulary of permitted cross references. Please see <a href="http://www.ncbi.nlm.nih.gov/entrez/eutils/einfo.fcgi?">http://www.ncbi.nlm.nih.gov/entrez/eutils/einfo.fcgi?</a> .                                                                 |
| run        | run_attribute                 | Properties and attributes of a RUN. These can be entered as free-form tag-value pairs. For certain studies, submitters may be asked to follow a community established ontology when describing the work.                                                         |

|            |                      |                                                                                                                                                                                                                                                                                                                                   |
|------------|----------------------|-----------------------------------------------------------------------------------------------------------------------------------------------------------------------------------------------------------------------------------------------------------------------------------------------------------------------------------|
| run        | submission_accession | Submission accession                                                                                                                                                                                                                                                                                                              |
| run        | broker_name          | Broker authority of this document. If not provided, then the broker is considered "direct".                                                                                                                                                                                                                                       |
| run        | sra_link             |                                                                                                                                                                                                                                                                                                                                   |
| run        | xref_link            |                                                                                                                                                                                                                                                                                                                                   |
| run        | entrez_link          |                                                                                                                                                                                                                                                                                                                                   |
| run        | ddbj_link            |                                                                                                                                                                                                                                                                                                                                   |
| run        | ena_link             |                                                                                                                                                                                                                                                                                                                                   |
| run        | date_updated         | Datetime the record synchronized with SRA, ERA and DRA                                                                                                                                                                                                                                                                            |
| data_block | ID                   |                                                                                                                                                                                                                                                                                                                                   |
| data_block | name                 | The plate/slide/flowcell name for this data block. (454) plate name (Illumina) flowcell name (SOLiD) slide name (Helicos) flowcell                                                                                                                                                                                                |
| data_block | sector               | Higher level partition of run data to which this data block pertains. (454) not used (Illumina) Lane number (SOLiD) slide (Helicos) channel                                                                                                                                                                                       |
| data_block | region               | Lower level partition of run data to which this data block pertains, typically the field of view for the imaging camera. (454) 0 if whole plate is used, 1..16 for gasket partition. (Illumina) Tile number (1..200+), or use 0 if file contains all tiles. (SOLiD) Panel number (1..4096), or use 0 if file contains all panels. |
| data_block | files                | Actual run data are contained in one of the files listed in the submission manifest. Each data block is represented by one SRF file, one SFF file, one compressed fastq file, or one compressed tar archive file.                                                                                                                 |
| data_block | run_accession        | Submission accession                                                                                                                                                                                                                                                                                                              |
| data_block | date_updated         | Datetime the record synchronized with SRA, ERA and DRA                                                                                                                                                                                                                                                                            |
